# Supplementary figures and images for: Prognostic impact of follow-up pulmonary vascular resistance in pulmonary arterial hypertension
Source: HighWire-hosted journal article supplement (doi:10.1136/openhrt-2022-002054), 2022-06-01

## Supplement Figure 1

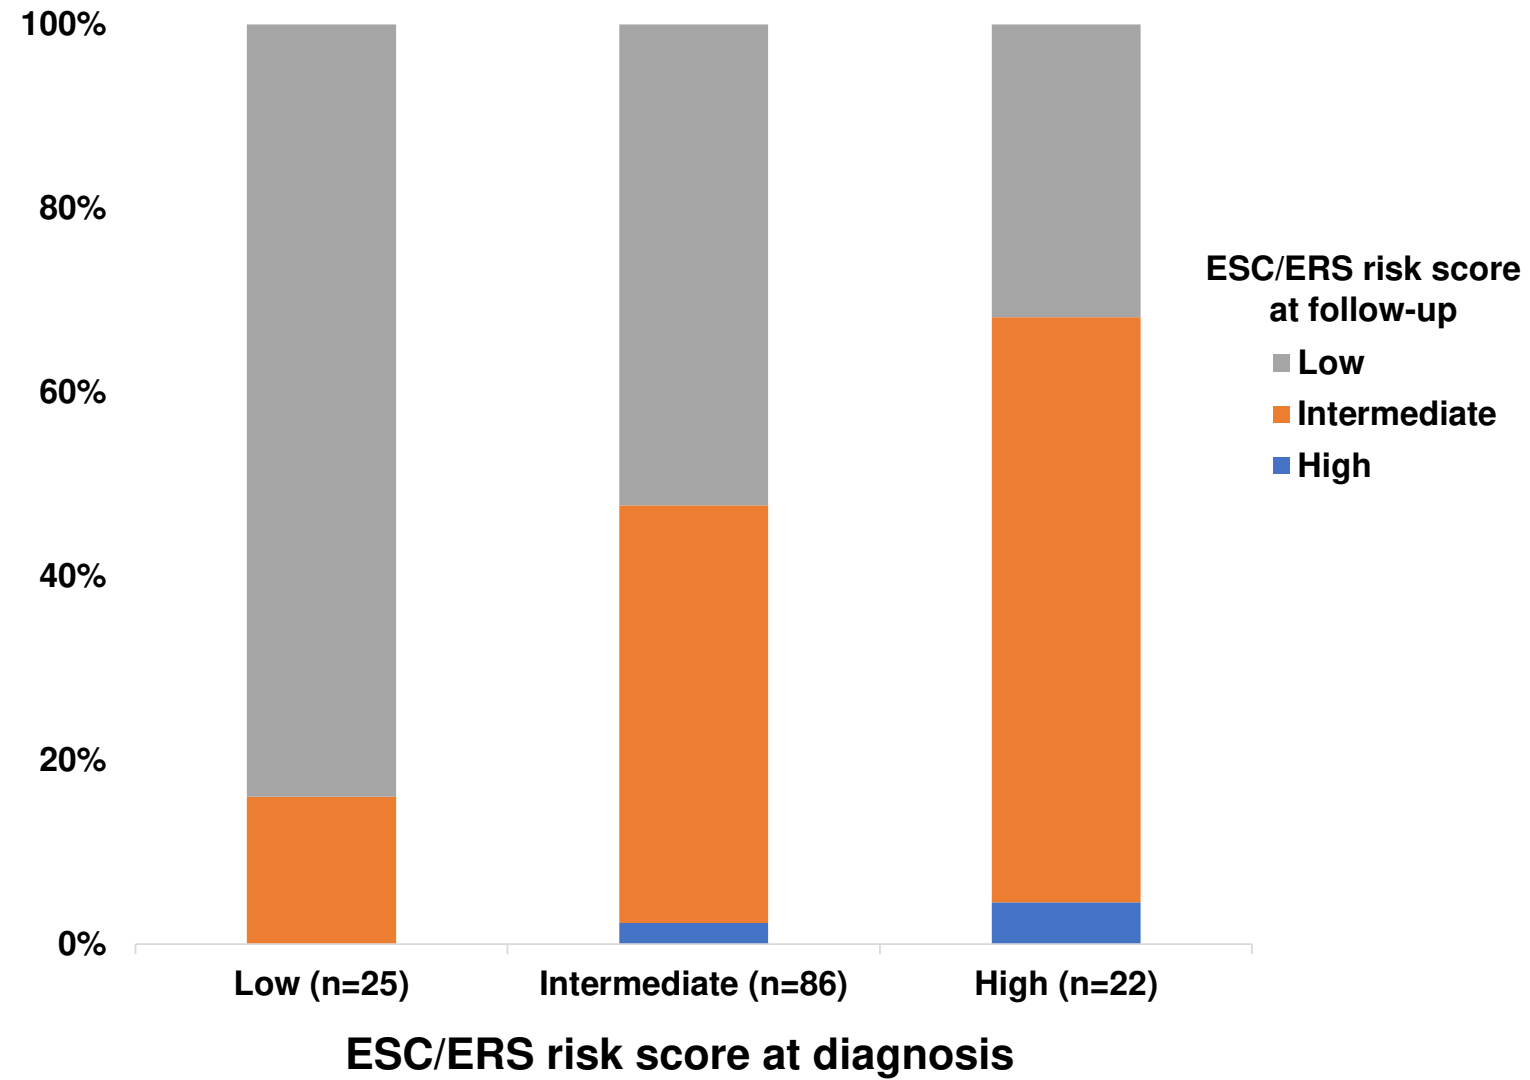

## Supplement Figure 2

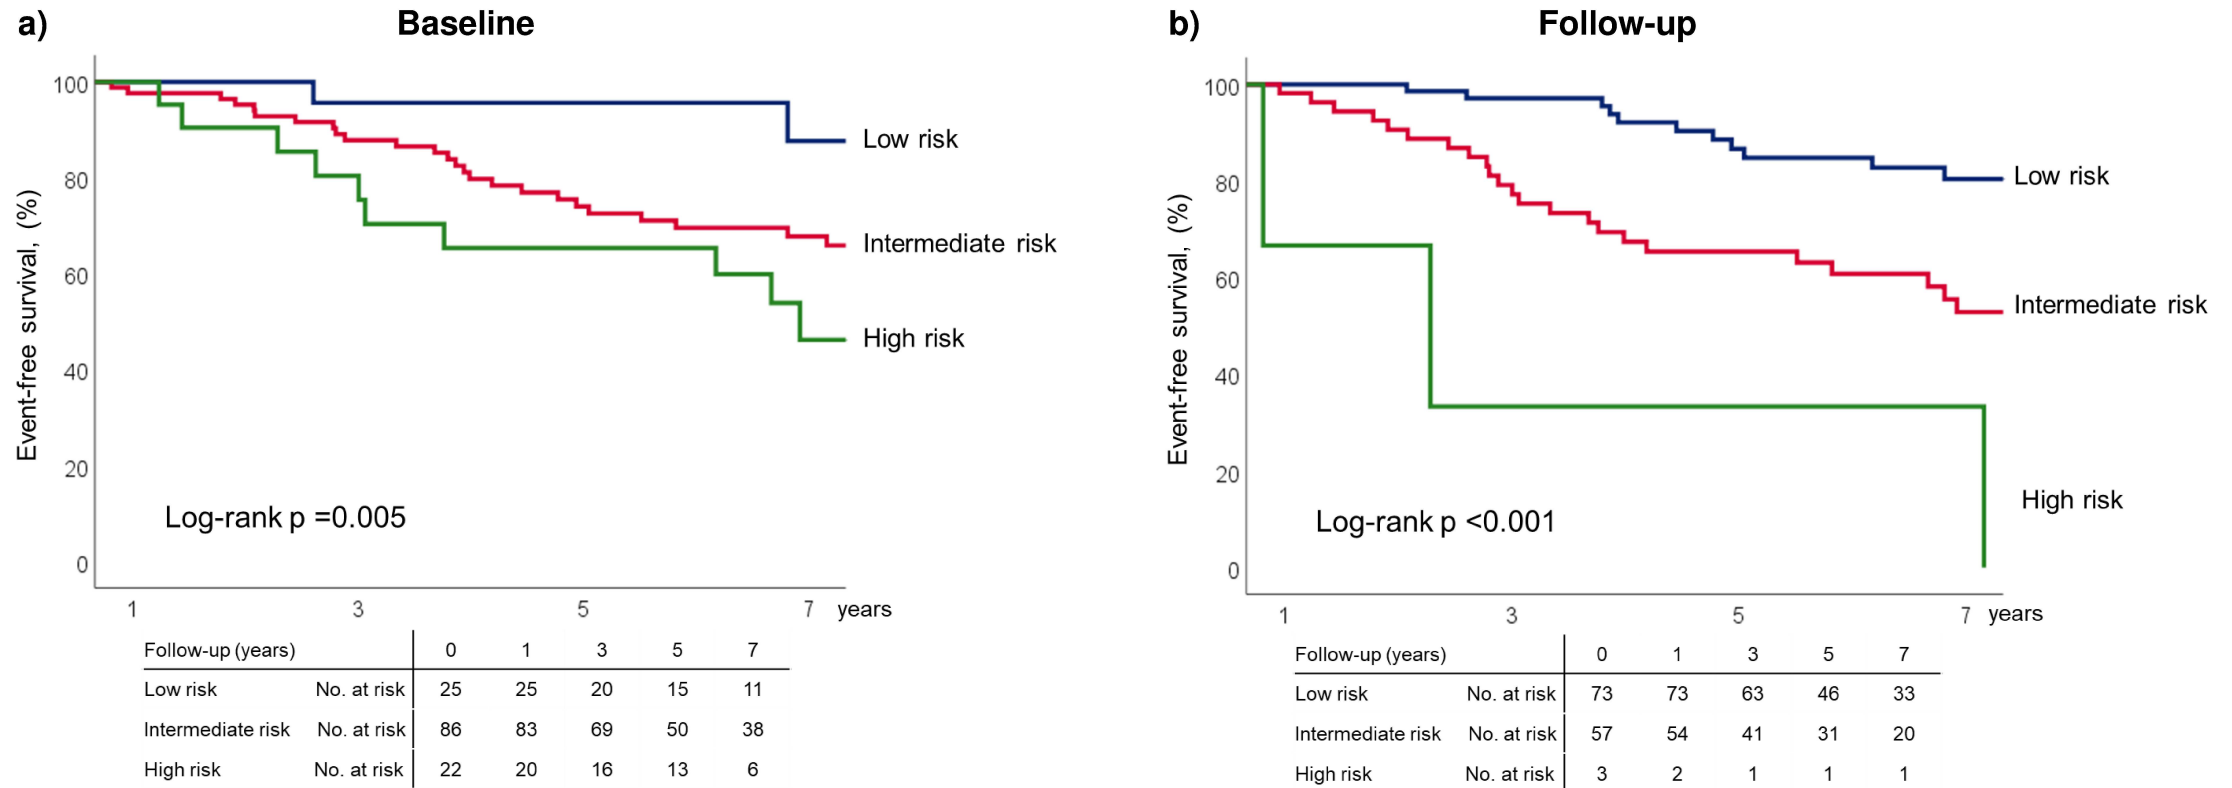

Supplement: openhrt-2022-002054supp001_data_supplement.pdf [file openhrt-2022-002054supp001_data_supplement.pdf]
